# Supplementary material for: The importance of helix P1 stability for structural pre-organization and ligand binding affinity of the adenine riboswitch aptamer domain
Source: PubMed Central journal article supplement — RNA Biol. 2014 Jun 12;11(5):655–66. doi: 10.4161/rna.29439 (PMC4152369; doi:10.4161/rna.29439), 2014-06-12
Supplement: rna-11-655-s01.pdf [file rna-11-655-s01.pdf]

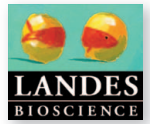

## **Supplemental Material to:**

**Senada Nozinovic, Anke Reining, Yong-Boum Kim,  
Jonas Noeske, Kai, Schlepckow, Jens Wöhnert,  
Harald Schwalbe**

**The importance of helix P1 stability for structural pre-  
organization and ligand binding affinity of the adenine  
riboswitch aptamer domain**

**2014; 11(5)**

**<http://dx.doi.org/10.4161/rna.29439>**

**[www.landesbioscience.com/journals/rnabiology/article/29439/](http://www.landesbioscience.com/journals/rnabiology/article/29439/)**

## Supporting Information

### **Aptamer Domain Of The Adenine-Sensing Riboswitch: Role Of Helix Stability In Structural Pre-Organization And Binding Affinity**

Senada Nozinovic<sup>1,2</sup>, Anke Reining<sup>1,2</sup>, Yong-Boum Kim<sup>1,2</sup>, Jonas Noeske<sup>3</sup>, Kai Schlepckow<sup>1,2</sup>, Jens Wöhnert<sup>1,4</sup>, Harald Schwalbe<sup>1,2\*</sup>

<sup>1</sup>Johann Wolfgang Goethe-University Frankfurt, Center for Biomolecular Magnetic Resonance (BMRZ), Max-von-Laue-Strasse 7, 60438 Frankfurt/Main, Germany

<sup>2</sup>Institute of Organic Chemistry and Chemical Biology

<sup>3</sup>Department of Molecular and Cell Biology, University of California at Berkeley, Berkeley, CA 94720, USA.

<sup>4</sup>Institute for Molecular Biosciences Max-von-Laue-Strasse 9, 60438 Frankfurt (Germany)

\* To whom correspondence should be addressed.

Email: [schwalbe@nmr.uni-frankfurt.de](mailto:schwalbe@nmr.uni-frankfurt.de), Tel: (+49)69-798-29130, Fax: (+49) 6979829515

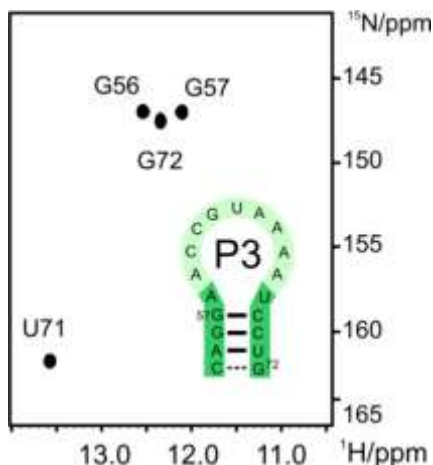

Figure S1: Secondary structure of isolated helix P3 ([RNA]=1 mM). Imino regions of the 2D-  $^1\text{H}$ ,  $^{15}\text{N}$ -HSQC spectra at 283 K in the presence of  $\text{Mg}^{2+}$ .

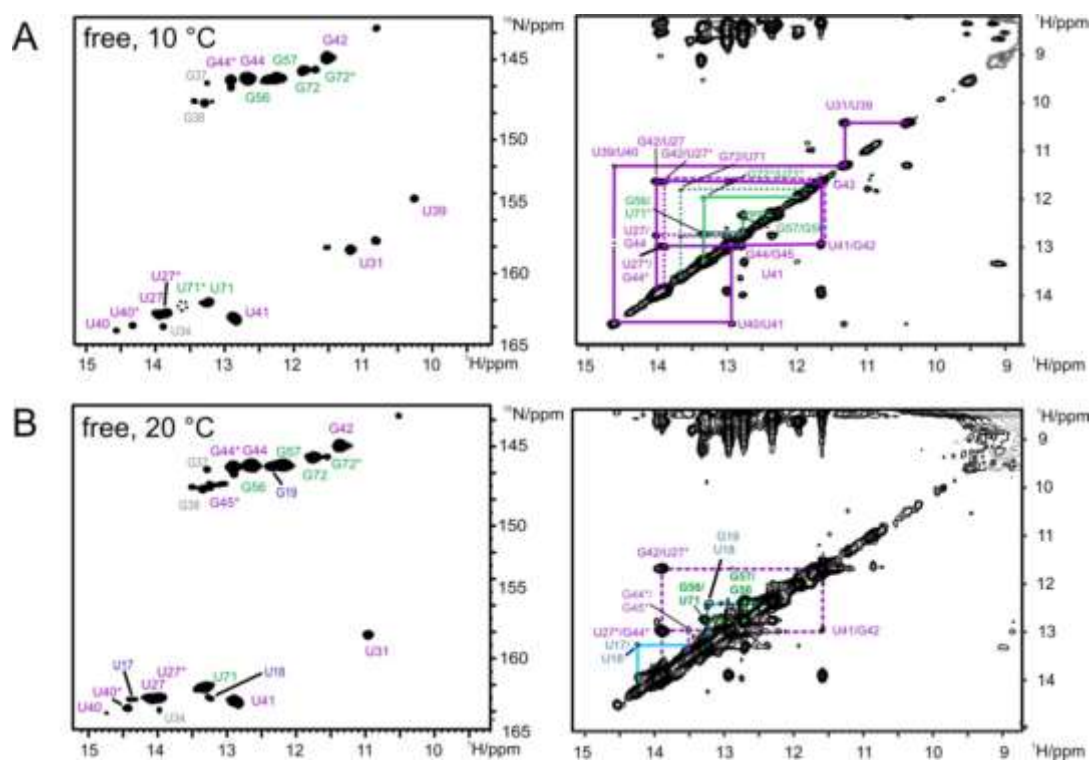

Figure S2: Temperature-induced changes in the wild-type aptamer domain ([RNA] = 0.5 mM). Imino regions of the 2D-  $^1\text{H}$ ,  $^{15}\text{N}$ -HSQC spectra (left) and 2D-  $^1\text{H}$ ,  $^1\text{H}$ -NOESY spectra with 200 ms mixing time (right) measured at 900 MHz and 10 °C (A) and 20 °C (B). NOE connectivities by solid lines and dashed lines (and \*) indicate two different conformations. The color code for assignments is adapted to the presentation of the secondary structure in Figure 4D.

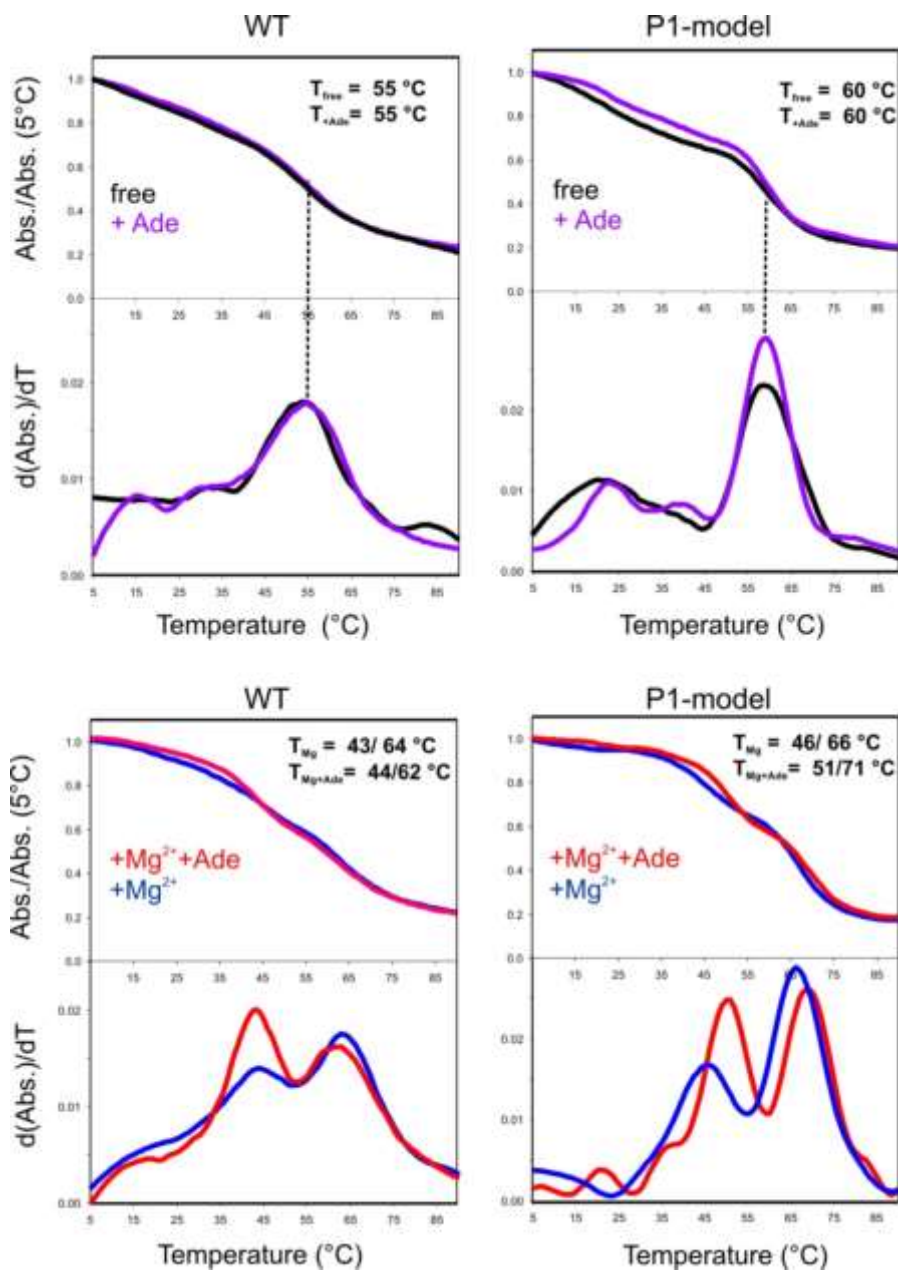

Figure S3: Thermal stability of aptamer domains. The CD melting curves of the wild-type and the P1-model aptamer domain under different conditions (free, with Mg<sup>2+</sup> and/or adenine) are recorded at a wavelength of 258 nm. The first derivative of the CD melting curve is shown below.
